# Supplementary material
Source: publisher figshare collection journal article supplement (https://sage.figshare.com/ndownloader/files/17868368)
Supplement: Supplementary file 1 [file 17868368]

Table S1 Characteristics of 27 included studies

| Study (First author, year)      | Type of disease | Journal                             | Country | Inclusion period | Research center                  | Anti-TNF- $\alpha$ agents/Control                                          | Pre-operative agents window                                                                      | Anti-TNF- $\alpha$ | Concomitant medication                                                              |
|---------------------------------|-----------------|-------------------------------------|---------|------------------|----------------------------------|----------------------------------------------------------------------------|--------------------------------------------------------------------------------------------------|--------------------|-------------------------------------------------------------------------------------|
| <b>Appau KA et al. 2008</b>     | CD              | Journal of Gastrointestinal Surgery | USA     | 1998-2007        | Cleveland Clinic                 | 60/329                                                                     | Within 3 months                                                                                  |                    | Steroids<br>5-ASA<br>6-MP/AZA<br>MTX                                                |
| <b>Bregnbak D et al. 2012</b>   | UC              | Journal of Crohn's and Colitis      | Denmark | 2005-2010        | Hvidovre Hospital                | 20/51                                                                      | Within 12 weeks                                                                                  |                    | Corticosteroids<br>Immunomodulators<br>agents<br>5-ASA                              |
| <b>Canedo J et al. 2011</b>     | CD              | Colorectal Disease                  | USA     | 2000-2008        | Cleveland Clinic Florida         | 65/85                                                                      | Within 3 months                                                                                  |                    | Steroids<br>Immunosuppressive drugs                                                 |
| <b>Ferrante M et al. 2009</b>   | UC              | Inflammatory Bowel Diseases         | Belgium | 1998-2008        | University Hospital Leuven       | 22/119                                                                     | Within 12 weeks                                                                                  |                    | Corticosteroids<br>AZA<br>6-MP<br>MTX<br>CsA                                        |
| <b>Ferrante M et al. 2017</b>   | UC              | Journal of Crohn's and Colitis      | Belgium | 2006-2016        | University Hospitals of Leuven   | 60/71(Within 8 weeks)<br>66/80(Within 12 weeks)                            | Within 8 weeks/Within 12 weeks                                                                   |                    | Mesalamine<br>Steroids<br>Thiopurines<br>Methotrexate<br>Ciclosporin<br>Antibiotics |
| <b>Gainsbury ML et al. 2011</b> | UC              | Journal of Gastrointestinal Surgery | USA     | 2005-2009        | Boston University Medical Center | 29/52                                                                      | Within 12 weeks                                                                                  |                    | CsA(control)<br>MTX<br>AZA<br>6-MP<br>Steroids                                      |
| <b>Gu JY et al. 2013</b>        | UC              | Diseases of the Colon & Rectum      | USA     | 2006-2010        | Cleveland Clinic                 | 25/156(proctocolectomy/I PAA)<br>142/265(Subtotal colectomy/end ileostomy) | Infliximab (within 12 weeks)<br>Adalimumab(within 4 weeks)<br>Certulizumab Pegol(within 4 weeks) |                    | AZA/6-MP<br>Steroid                                                                 |
| <b>Kotze PG et al.</b>          | CD              | Digestive                           | Brazil  | 2007-2014        | IBD referral units from          | 71/52                                                                      | Within 8 weeks                                                                                   |                    | Steroids                                                                            |

|                                     |     |                                             |         |           |                                                        |                                                            |                                                       |                                                      |
|-------------------------------------|-----|---------------------------------------------|---------|-----------|--------------------------------------------------------|------------------------------------------------------------|-------------------------------------------------------|------------------------------------------------------|
| <b>2017</b>                         |     | Diseases and Sciences                       |         | Brazil    |                                                        |                                                            |                                                       | Immunomodulators                                     |
| <b>Kotze PG et al. 2017(AD)</b>     | CD  | Colorectal Disease                          | Brazil  | NA        | IBD referral units in Brazil                           | 25/25                                                      | Within 8 weeks                                        | Steroids<br>AZA/6-MP                                 |
| <b>Krane MK et al. 2013</b>         | IBD | Diseases of the Colon & Rectum              | USA     | 2004-2011 | University of Chicago Medical Center                   | 142/376                                                    | Within 8 weeks                                        | Steroids<br>Immunomodulators<br>5-ASA                |
| <b>Kunitake H et al. 2008</b>       | IBD | journal of gastrointestinal surgery         | USA     | 1993-2007 | Massachusetts General Hospital                         | 101/312                                                    | Within 12 weeks                                       | Steroid<br>AZA/6-MP                                  |
| <b>Lightner AL et al. 2017(CD)</b>  | CD  | Alimentary Pharmacology & Therapeutics      | USA     | 2014-2016 | Mayo Clinic Rochester electronic medical record system | 107/105                                                    | Within 12 weeks                                       | Steroids<br>Immunomodulators                         |
| <b>Lightner AL et al. 2017(IBD)</b> | IBD | Journal of Crohn's and Colitis              | USA     | 2014-2015 | Mayo Clinic Rochester                                  | 126/172                                                    | Within 12 weeks                                       | Steroids<br>Immunomodulators                         |
| <b>Myrelid P et al. 2014</b>        | CD  | British Journal of Surgery                  | UK      | NA        | Tertiary referral centres                              | 111/187                                                    | Within 2 months/more than 2 months                    | Steroids<br>AZA/6-MP<br>MTX<br>Mycophenolate mofetil |
| <b>Nelson R et al. 2014</b>         | UC  | Inflammatory Bowel Diseases                 | USA     | 2006-2012 | University of Chicago Hospitals                        | 24/31                                                      | 2 weeks (range: 1–5)                                  | Corticosteroids<br>CsA                               |
| <b>Nørgård BM et al. 2014</b>       | CD  | Alimentary Pharmacology & Therapeutics      | Denmark | 2000-2010 | The Danish National Patient Registry                   | Within 14 days:43<br>Within 12 weeks: 214<br>Control: 2079 | Within 14 day<br>Within 15-30 days<br>Within 12 weeks | Steroids AZA/6-MP                                    |
| <b>Nørgård BM et al. 2012</b>       | UC  | Alimentary Pharmacology and Therapeutics    | Denmark | 2003-2010 | Denmark (The whole country)                            | 199/1027                                                   | Within 12 weeks                                       | Steroids<br>AZA/6-MP<br>MTX or CsA                   |
| <b>Rizzo G et al. 2011</b>          | IBD | International journal of colorectal disease | Italy   | 2001-2008 | Complesso Integrato Columbus Hospital                  | 54/60                                                      | Within 12 weeks                                       | Steroids<br>Immunomodulators                         |
| <b>Shwaartz C et</b>                | IBD | Journal of                                  | USA     | 2013-2015 | Mount Sinai Medical                                    | 73/209                                                     | Within 8 weeks                                        | Steroids                                             |

|                                 |     |                                             |                          |           |                                                                     |                                                                      |                                                           |                                                              |
|---------------------------------|-----|---------------------------------------------|--------------------------|-----------|---------------------------------------------------------------------|----------------------------------------------------------------------|-----------------------------------------------------------|--------------------------------------------------------------|
| <b>al. 2016</b>                 |     | gastrointestinal surgery                    |                          |           | Center                                                              |                                                                      |                                                           | Immunomodulators<br>ASA                                      |
| <b>Syed A et al. 2013</b>       | CD  | American Journal of Gastroenterology        | USA                      | 2004-2011 | University of Maryland School of Medicine                           | 150/175                                                              | Within 8 weeks                                            | Corticosteroids<br>6-MP/AZA<br>MTX                           |
| <b>Uchino M et al. 2013(UC)</b> | UC  | International Journal of Colorectal Disease | Japan                    | 2010-2012 | Hyogo College of Medicine                                           | 22/174                                                               | Within 12 weeks                                           | Prednisolone<br>Immunomodulators                             |
| <b>Uchino M et al. 2013(CD)</b> | CD  | Diseases of the Colon & Rectum              | Japan                    | 2008-2011 | Surgical Department of Hyogo College of Medicine                    | 79/326                                                               | Within 12 weeks                                           | Corticosteroids<br>5-aminosalicylic acid<br>Immunomodulators |
| <b>Ward ST et al. 2017</b>      | UC  | Colorectal Disease                          | UK                       | 2006-2015 | Hospital Episode Statistics data maintained National Health Service | Within 12 weeks:753/5472<br>Within 4 weeks:418/5807                  | Within 4 week/Within 12 weeks                             | NA                                                           |
| <b>Waterman M et al. 2013</b>   | IBD | Gut                                         | Canada                   | 2000-2010 | Mount Sinai Hospital                                                | Within 12 days:56<br>15-30 days:48<br>31-180 days:89<br>Controls:278 | Within 12 days<br>Within 15-30 days<br>Within 31-180 days | Corticosteroids<br>AZA/6-MP                                  |
| <b>Yamada A et al. 2017</b>     | IBD | American Journal of Gastroenterology        | USA                      | 2014-2016 | IBD database of institutional review board                          | UC:33/129CD:96/121                                                   | Within 4 weeks prior to surgery                           | Steroids<br>Immunomodulators                                 |
| <b>Yamamoto T et al. 2016</b>   | CD  | United European Gastroenterology Journal    | Japan<br>Brazil<br>Italy | 2008-2013 | International multicentre                                           | 79/152                                                               | Within 8 weeks                                            | Steroids<br>AZA/6-MP                                         |
| <b>Zittan E et al. 2016</b>     | UC  | Inflammatory Bowel Diseases                 | Canada                   | 2002-2013 | Mount Sinai Hospital                                                | Within 12 days:10<br>15-30 days:17<br>31-180 days:54<br>Controls:562 | Within 12 days<br>Within 15-30 days<br>Within 31-180 days | Corticosteroids<br>AZA/6-MP                                  |

Table S1 Continued

| Study (First author,year) | Type of anti-TNF-α agents                                     | Type of surgery                                                                                                                                    | Age of surgery(years)                                                                 |                                                                                  | Sex (Male/Female)                                                   |                                                                       |
|---------------------------|---------------------------------------------------------------|----------------------------------------------------------------------------------------------------------------------------------------------------|---------------------------------------------------------------------------------------|----------------------------------------------------------------------------------|---------------------------------------------------------------------|-----------------------------------------------------------------------|
|                           |                                                               |                                                                                                                                                    | Anti-TNF-α agents                                                                     | Control                                                                          | Anti-TNF-α agents                                                   | Control                                                               |
| Appau KA et al. 2008      | Infliximab                                                    | Ileocolonic Resection                                                                                                                              | 35.83±11.90                                                                           | 36.84±14.37                                                                      | 29/31                                                               | 151/178                                                               |
| Bregnbak D et al. 2012    | Infliximab                                                    | Colectomy                                                                                                                                          | Median: 39.8 (range: 29.1–49.5)                                                       | Median: 40.6 (range: 28.7–51.4)                                                  | 9/11                                                                | 29/22                                                                 |
| Canedo J et al. 2011      | Infliximab                                                    | Ileocolic resection<br>Total colectomy<br>Proctectomy                                                                                              | Median: 26 (range: 16–72)                                                             | Median: 32 (range: 18–78)                                                        | 29/36                                                               | 46/39                                                                 |
| Ferrante M et al. 2009    | Infliximab                                                    | IPAA                                                                                                                                               | Median: 26.1 (range: 16.2–43.0)                                                       | Median: 32.1 (range: 25.2–41.6)                                                  | 9/13                                                                | 49/70                                                                 |
| Ferrante M et al. 2017    | Infliximab(40)<br>Adalimumab(19)<br>Golimumab<br>Pegol(6)     | IPAA                                                                                                                                               | 35.5 (26.6 – 47.6)(Within 8 weeks)                                                    | 45.8 (35.2 – 56.1)(Within 8 weeks)                                               | 30/30(Within 8 weeks)                                               | 30/41(Within 8 weeks)                                                 |
| Gainsbury ML et al. 2011  | Infliximab                                                    | IPAA                                                                                                                                               | 36.2 ± 12.6                                                                           | 42.0 ± 12.7                                                                      | 11/18                                                               | 22/30                                                                 |
| Gu JY et al. 2013         | Infliximab(113)<br>Adalimumab(26)<br>Certulizumab<br>Pegol(3) | Total proctocolectomy/IPAA<br>Subtotal colectomy/end ileostomy                                                                                     | 39 (19–61)<br>(proctocolectomy/IPAA)<br>37 (18–77) (Subtotal colectomy/end ileostomy) | 39 (18–69)(proctocolectomy/IPAA)<br>41 (18–84)(Subtotal colectomy/end ileostomy) | 13/12(proctocolectomy /IPAA)74/68(Subtotal colectomy/end ileostomy) | 92/64(proctocolectomy /IPAA)152/113(Subtotal colectomy/end ileostomy) |
| Kotze PG et al. 2017      | Infliximab(39)Adalimumab(32)                                  | Small bowel resection<br>Ileocecal resection<br>Total colectomy                                                                                    | 35.4±12.3                                                                             | 38.5±14.1                                                                        | 39/32                                                               | 28/24                                                                 |
| Kotze PG et al. 2017(AD)  | Adalimumab                                                    | Intestinal resections                                                                                                                              | Median:36.6                                                                           | Median:36.8                                                                      | 14/11                                                               | 14/11                                                                 |
| Krane MK et al. 2013      | Infliximab                                                    | Hand-assisted aparoscopic surgery<br>Small-bowel resection<br>Ileocolic resection<br>Right hemicolectomy<br>Sigmoidectomy<br>Total proctocolectomy | 36.7 ± 13.9                                                                           | 39.2 ± 14.4                                                                      | 76/66                                                               | 198/178                                                               |

|                                     |                                         |                                            |                             |                             |        |          |
|-------------------------------------|-----------------------------------------|--------------------------------------------|-----------------------------|-----------------------------|--------|----------|
|                                     |                                         | Ileorectal anastomosis                     |                             |                             |        |          |
|                                     |                                         | IPAA                                       |                             |                             |        |          |
| <b>Kunitake H et al. 2008</b>       | Infliximab                              | Small bowel resection/J20strictureplasty   | Median:36.1                 | Median:37.8                 | 41/60  | 162/150  |
|                                     |                                         | R colect/ileoocectomy                      |                             |                             |        |          |
|                                     |                                         | Partial colectomy (transverse, left)       |                             |                             |        |          |
|                                     |                                         | Subtotal colectomy                         |                             |                             |        |          |
|                                     |                                         | Total proctocolectomy                      |                             |                             |        |          |
|                                     |                                         | Proctectomy                                |                             |                             |        |          |
|                                     |                                         | IPAA                                       |                             |                             |        |          |
| <b>Lightner AL et al. 2017(CD)</b>  | Infliximab                              | Colorectal resection Small bowel resection | Median: 39 (range: 19–69)   | Median: 35 (range: 18–70)   | 39/68  | 54/51    |
|                                     | Adalimumab                              |                                            |                             |                             |        |          |
|                                     | Certolizumab                            | Colorrectal and small bowel resection      |                             |                             |        |          |
|                                     | Pegol                                   |                                            |                             |                             |        |          |
| <b>Lightner AL et al. 2017(IBD)</b> | Any TNF-α agents                        | Small bowel resection                      | 41 (24–70)                  | 46 (24–70)                  | 67/59  | 97/93    |
|                                     |                                         | Ileocolonic resection                      |                             |                             |        |          |
|                                     |                                         | Colectomy                                  |                             |                             |        |          |
|                                     |                                         | Proctectomy                                |                             |                             |        |          |
|                                     |                                         | Total proctocolectomy                      |                             |                             |        |          |
|                                     |                                         | Ostomy only                                |                             |                             |        |          |
|                                     |                                         | Primary anastomosis                        |                             |                             |        |          |
| <b>Myrelid P et al. 2014</b>        | Infliximab(40/117)<br>Adalimumab(71/70) | Small bowel resection                      | Median: 35.6 (range: 12–82) | Median: 36.6 (range: 12–76) | 51/ 60 | 68/119   |
|                                     |                                         | Ileocolic resection                        |                             |                             |        |          |
|                                     |                                         | Colonic resection                          |                             |                             |        |          |
|                                     |                                         | Stoma closure                              |                             |                             |        |          |
|                                     |                                         | Strictureplasty alone                      |                             |                             |        |          |
|                                     |                                         | Including strictureplasty                  |                             |                             |        |          |
|                                     |                                         | Including severe adhesiolysis              |                             |                             |        |          |
| <b>Nelson R et al. 2014</b>         | Infliximab                              | IPAA                                       | Median: 41 (range: 18–85)   | Median: 52 (range: 18–79)   | 11/13  | 17/14    |
| <b>Nørgård BM et al. 2014</b>       | Infliximab                              | Small bowel resections                     | Median: 33 (range: 16–86)   | Median: 41 (range: 15–90)   | 97/117 | 852/1227 |
|                                     | Adalimumab                              | Ileocecal resection                        |                             |                             |        |          |
|                                     | Certolizumab                            | Right hemicolectomy                        |                             |                             |        |          |
|                                     | Pegol                                   | Other resections of small bowel and colon  |                             |                             |        |          |

|                                 |                                                                        |                                                                                                                                                                                                                                                         |                           |                           |        |         |
|---------------------------------|------------------------------------------------------------------------|---------------------------------------------------------------------------------------------------------------------------------------------------------------------------------------------------------------------------------------------------------|---------------------------|---------------------------|--------|---------|
|                                 |                                                                        | Other colon resections<br>Other bowel resections<br>Colectomies<br>Resections on rectum<br>Intestinal plastic for small bowel stricture                                                                                                                 |                           |                           |        |         |
| <b>Nørgård BM et al. 2012</b>   | Infliximab(167)<br>Adalimumab(15)<br>Unspecified anti-TNF-α agents(17) | Colectomy                                                                                                                                                                                                                                               | Median: 37 (range: 15–82) | Median: 42 (range: 15–95) | 95/104 | 527/500 |
| <b>Rizzo G et al. 2011</b>      | Infliximab(41)<br>Adalimumab(12)<br>Certulizumab<br>Pegol(1)           | Ileal pouchanal anastomosis                                                                                                                                                                                                                             | 39 (16–74)                | 39 (18–71)                | 35/19  | 36/24   |
| <b>Shwaartz1 C et al. 2016</b>  | InfliximabAdalimu<br>mabCertolizumab<br>Pegol                          | Ileoanal pouch leocolic resection<br>Partial colectomy<br>Ileostomy reversal<br>Small bowel resection<br>Ileosigmoid/ileorectal<br>Anastomosis                                                                                                          | 36.6 ± 14.5               | 42.6 ± 15.8               | 42/31  | 102/107 |
| <b>Syed A et al. 2013</b>       | Infliximab(104)<br>Adalimumab(29)<br>Certolizumab(17)                  | Creation of a stoma<br>anastomoses<br>Segmental colectomy<br>Right hemicolectomy<br>Left hemicolectomy<br>Total abdominal<br>colectomy/proctectomy<br>Ileocectomy<br>Small bowel resection<br>Ostomy creation as 1 ° procedure<br>Hernia/stoma revision | 38.2 ± 13.9               | 40.0 ± 14.3               | 51/99  | 79/96   |
| <b>Uchino M et al. 2013(UC)</b> | Infliximab                                                             | Total colectomy<br>Mucosal proctectomy<br>IPAA                                                                                                                                                                                                          | Median: 41 (range: 14–61) | Median: 43 (range: 10–85) | 15/7   | 114/60  |
| <b>Uchino M et al. 2013(CD)</b> | Infliximab                                                             | NA                                                                                                                                                                                                                                                      | Median: 36 (range: 14–72) | Median: 37 (range: 16–78) | 58/21  | 226/100 |

|                                 |                              |                                     |                                |                                |                         |                           |
|---------------------------------|------------------------------|-------------------------------------|--------------------------------|--------------------------------|-------------------------|---------------------------|
| <b>Ward ST et al.<br/>2017</b>  | Infliximab                   | Subtotal colectomy                  | within 12 weeks/within 4 weeks | within 12 weeks/within 4 weeks | Within 4 weeks243/175   | Within 4 weeks3371/2436   |
|                                 | Adalimumab                   |                                     |                                |                                | Within 12 weeks:411/312 | Within 12 weeks:3173/2299 |
|                                 | Golimumab                    |                                     | <18: 66/36                     | <18: 218/248                   |                         |                           |
|                                 |                              |                                     | 18-30: 253/134                 | 18-30: 1247/1366               |                         |                           |
|                                 |                              |                                     | 31-50: 255/145                 | 31-50: 1887/1997               |                         |                           |
|                                 |                              |                                     | 51-70: 155/89                  | 51-70: 1534/1600               |                         |                           |
|                                 |                              |                                     | >70: 24/14                     | >70: 586/596                   |                         |                           |
| <b>Waterman M et al. 2013</b>   | Infliximab                   | Small bowel resection               | Median:21                      | Median:23                      | 138/57                  | 223/55                    |
|                                 | Adalimumab                   | Subtotal colectomy and ileostomy    |                                |                                |                         |                           |
|                                 |                              | Ileostomy/colostomy                 |                                |                                |                         |                           |
|                                 |                              | Closure of ileostomy/colostomy      |                                |                                |                         |                           |
|                                 |                              | Pelvic pouch procedure              |                                |                                |                         |                           |
|                                 |                              | Completion proctectomy              |                                |                                |                         |                           |
|                                 |                              | Total proctocolectomy and ileostomy |                                |                                |                         |                           |
| <b>Yamada A et al.<br/>2017</b> | Infliximab                   | Small bowel resection               | 39.4±13.6                      | 39.8±15.4                      | 61/68                   | 126/124                   |
|                                 | Adalimumab                   | Colonic resection                   |                                |                                |                         |                           |
|                                 |                              | Ileocectomy                         |                                |                                |                         |                           |
|                                 |                              | Ileocolectomy                       |                                |                                |                         |                           |
|                                 |                              | Strictureplasty                     |                                |                                |                         |                           |
|                                 |                              | Proctectomy                         |                                |                                |                         |                           |
|                                 |                              | Total colectomy                     |                                |                                |                         |                           |
|                                 |                              | J-pouch creation or resection       |                                |                                |                         |                           |
|                                 |                              | Examination under anesthesia        |                                |                                |                         |                           |
|                                 |                              | Ostomy creation                     |                                |                                |                         |                           |
|                                 |                              | Ileostomy takedown                  |                                |                                |                         |                           |
|                                 |                              | Hernia repair                       |                                |                                |                         |                           |
| <b>Yamamoto T et al. 2016</b>   | Infliximab(55)               | Ileocolonic resection               | <17 years: 14                  | <17 years: 13                  | 47/32                   | 97/55                     |
|                                 | Adalimumab(23)               | Small bowel strictureplasty         | 17–40 years: 56                | 17–40 years: 105               |                         |                           |
|                                 | Infliximab and adalimumab(1) | Small bowel resection               | >40 years: 9                   | >40 years: 34                  |                         |                           |
|                                 |                              | Colonic resection                   |                                |                                |                         |                           |
| <b>Zittan E et al. 2016</b>     | Any TNF-α agents             | IPAA                                | 31 (IQR:24, 42)                | 39 (IQR:29, 47)                | 115/81                  | 322/240                   |

**Table S1 Continued**

| Study (First | Timing of surgery | Details of complications (number) |
|--------------|-------------------|-----------------------------------|
|--------------|-------------------|-----------------------------------|

| author, year)           | Anti-TNF- $\alpha$ agents | Control                  | Anti-TNF- $\alpha$ agents           | Control                             |
|-------------------------|---------------------------|--------------------------|-------------------------------------|-------------------------------------|
| Appau KA et al.<br>2008 | NA                        | NA                       | Urinary complications (1)           |                                     |
|                         |                           |                          | Wound dehiscence (0)                | Urinary complications (0)           |
|                         |                           |                          | 30-Day mortality (1)                | Wound dehiscence (1)                |
|                         |                           |                          | Readmission rate (12)               | 30-Day mortality (0)                |
|                         |                           |                          | Sepsis (12)                         | Readmission rate (31)               |
|                         |                           |                          | Intraabdominal abscess (6)          | Sepsis (32)                         |
|                         |                           |                          | Anastomotic leak (6)                | Intraabdominal abscess (14)         |
|                         |                           |                          | Reoperation (5)                     | Anastomotic leak (14)               |
| Bregnbak D et al. 2012  | NA                        | NA                       |                                     | Reoperation (10)                    |
|                         |                           |                          | Fever (4)                           | Fever (9)                           |
|                         |                           |                          | Wound infection (1)                 | Wound infection (7)                 |
|                         |                           |                          | Abscess (1)                         | Abscess (2)                         |
|                         |                           |                          | Pneumonia (1)                       | Pneumonia (1)                       |
|                         |                           |                          | Gastroenteritis (0)                 | Gastroenteritis (2)                 |
|                         |                           |                          | Candida infection (0)               | Candida infection (1)               |
|                         |                           |                          | Epididymitis (1)                    | Epididymitis (0)                    |
|                         |                           |                          | Urinary tract infection (0)         | Urinary tract infection (1)         |
|                         |                           |                          | Sepsis (0)                          | Sepsis (1)                          |
|                         |                           |                          | Infection of undetermined cause (0) | Infection of undetermined cause (1) |
|                         |                           |                          | Ileus (6)                           | Ileus (7)                           |
|                         |                           |                          | Wound rupture (1)                   | Wound rupture (13)                  |
|                         |                           |                          | Drug-induced eczema (0)             | Drug-induced eczema (2)             |
|                         |                           |                          | Postspinal headache (0)             | Postspinal headache (2)             |
|                         |                           |                          | Deep vein thrombosis (0)            | Deep vein thrombosis (1)            |
|                         |                           |                          | Delirium (0)                        | Delirium (1)                        |
|                         |                           |                          | Emphysema (0)                       | Emphysema (1)                       |
|                         |                           |                          | Total(10)                           | Total(25)                           |
|                         |                           |                          | Infectious(4)                       | Infectious(21)                      |
|                         |                           |                          | Non-infectious(6)                   | Non-infectious(9)                   |
| Canedo J et al.<br>2011 | Urgent:5<br>Elective:60   | Urgent:15<br>Elective:70 | Wound infection (9)                 | Wound infection (6)                 |
|                         |                           |                          | Pulmonary infection (1)             | Pulmonary infection (3)             |
|                         |                           |                          | Abscesses (2)                       | Abscesses (6)                       |
|                         |                           |                          | Anastomotic leakage (2)             | Anastomotic leakage (4)             |
| Ferrante M et al.       | NA                        | NA                       | Reoperations (2)                    | Reoperations (7)                    |
|                         |                           |                          | Anastomotic leak(0)                 | Anastomotic leak(15)                |



|                                 |                                                                 |                                                                 |                                                                                                                                                                                                                                                                                                 |                                                                                                                                                                                                                                                                                                                                                                                                                                                                                                                                               |
|---------------------------------|-----------------------------------------------------------------|-----------------------------------------------------------------|-------------------------------------------------------------------------------------------------------------------------------------------------------------------------------------------------------------------------------------------------------------------------------------------------|-----------------------------------------------------------------------------------------------------------------------------------------------------------------------------------------------------------------------------------------------------------------------------------------------------------------------------------------------------------------------------------------------------------------------------------------------------------------------------------------------------------------------------------------------|
| <b>2009</b>                     |                                                                 |                                                                 | Pelvic abscess(0)<br>Pouch-related complications(0)<br>Wound infection(1)<br>Surgical site infectious complications(1)<br>Nonsurgical site infectious complications(1)<br>Any infectious complications(2)                                                                                       | Pelvic abscess(9)<br>Pouch-related complications(18)<br>Wound infection(10)<br>Surgical site infectious complications(23)<br>Nonsurgical site infectious complications(10)<br>Any infectious complications(29)                                                                                                                                                                                                                                                                                                                                |
| <b>Ferrante M et al. 2017</b>   | NA                                                              | NA                                                              | Within 8 weeks/12weeks<br>Anastomotic leak(1/1)<br>Pouch-related infectious complications(2/2)<br>Surgical site infectious complications(8/10)<br>Other infectious(10/12)<br>Infectious complications overall(16/19)<br>Non-infectious complications overall(22/25)<br>Any complications(29/33) | Within 8 weeks:Anastomotic leak(6)<br>Pouch-related infectious complications(7)<br>Surgical site infectious complications(11)<br>Other infectious(17)<br>Infectious complications overall(23)<br>Non-infectious complications overall(31)<br>Any complications(40)<br><br>Within 12 weeks:Anastomotic leak(6)<br>Pouch-related infectious complications(7)<br>Surgical site infectious complications(13)<br>Other infectious(16)<br>Infectious complications overall(24)<br>Non-infectious complications overall(33)<br>Any complications(43) |
| <b>Gainsbury ML et al. 2011</b> | Urgent:3<br>Elective:26                                         | Urgent:5<br>Elective:47                                         | Overall(13)<br>Infectious(5)<br>Pelvic/intraabdominal abscess(4)<br>Wound infection(1)<br>Non-infectious(12)<br>Pouch/anastomotic leak(1)<br>Pouch-related(0)<br>Other(12)                                                                                                                      | Overall(23)<br>Infectious(14)<br>Pelvic/intraabdominal abscess(7)<br>Wound infection(10)<br>Non-infectious(16)<br>Pouch/anastomotic leak(5)<br>Pouch-related(2)<br>Other(13)                                                                                                                                                                                                                                                                                                                                                                  |
| <b>Gu JY et al. 2013</b>        | Urgent:42<br>Elective:100<br>(Subtotal colectomy/end ileostomy) | Urgent:96<br>Elective:159<br>(Subtotal colectomy/end ileostomy) | proctocolectomy/IPAA:<br>Postoperative morbidity (11)<br>Anastomotic leak(2)<br>Pelvic sepsis (4)<br>Wound infection(2)<br>Early postoperative smallbowel obstruction(1)<br>Postoperative hemorrhage(0)                                                                                         | proctocolectomy/IPAA:<br>Postoperative morbidity (84)<br>Anastomotic leak(12)<br>Pelvic sepsis (11)<br>Wound infection(10)<br>Early postoperative smallbowel obstruction(6)<br>Postoperative hemorrhage(5)                                                                                                                                                                                                                                                                                                                                    |

|                                     |          |          |                                                                                                                                                                                                                                                                                                                                        |                                                                                                                                                                                                                                                                                                                                         |
|-------------------------------------|----------|----------|----------------------------------------------------------------------------------------------------------------------------------------------------------------------------------------------------------------------------------------------------------------------------------------------------------------------------------------|-----------------------------------------------------------------------------------------------------------------------------------------------------------------------------------------------------------------------------------------------------------------------------------------------------------------------------------------|
|                                     |          |          | Subtotal colectomy/end ileostomy:<br>Postoperative mortality(2)<br>Postoperative morbidity(67)<br>Pelvic abscess(3)<br>(Colo)rectal stump leak(16)<br>Wound infection(21)<br>Urinary tract infection(2)Pneumonia(2)<br>Ileus(17)<br>Postoperative hemorrhage(3)<br>Stoma complications(3)<br>Thromboembolic complications(7)           | Subtotal colectomy/end ileostomy:<br>Postoperative mortality(1)<br>Postoperative morbidity(135)<br>Pelvic abscess(12)<br>(Colo)rectal stump leak(24)<br>Wound infection(28)<br>Urinary tract infection(8)Pneumonia(2)<br>Ileus(34)<br>Postoperative hemorrhage(9)<br>Stoma complications(7)<br>Thromboembolic complications(22)         |
| <b>Kotze PG et al.<br/>2017</b>     | Elective | Elective | Over all surgical complication (28)<br>Abdominal abscesses (10)<br>Anastomotic dehiscence (6)<br>Bowel obstruction (3)<br>Surgical site infection (26)<br>Reoperation (12)<br>Overall medical complication (15)<br>Pneumonia (7)<br>Urinary tract infections (1)<br>Other complications (12)<br>Readmissions (8)<br>Death (2)          | Over all surgical complication (17)<br>Abdominal abscesses (2)<br>Anastomotic dehiscence (6)<br>Bowel obstruction (5)<br>Surgical site infection (11)<br>Reoperation (7)<br>Overall medical complication (11)<br>Pneumonia (3)<br>Urinary tract infections (2)<br>Other complications (8)<br>Readmissions (1)<br>Death (2)              |
| <b>Kotze PG et al.<br/>2017(AD)</b> | Elective | Elective | Surgical complications<br>Overall Surgical complications (9)<br>Abdominal abscess (3)<br>Bowel Obstruction (0)<br>Anastomotic Dehiscence (2)<br>Surgical Site Infection (9)<br>Reoperation (4)<br><br>Overall Medical complications (3)<br>Pneumonia (0)<br>Urinary tract infection (0)<br>Other complications (5)<br>Readmissions (2) | Surgical complications<br>Overall Surgical complications (10)<br>Abdominal abscess (2)<br>Bowel Obstruction (3)<br>Anastomotic Dehiscence (4)<br>Surgical Site Infection (6)<br>Reoperation (4)<br><br>Overall Medical complications (9)<br>Pneumonia (2)<br>Urinary tract infection (1)<br>Other complications (6)<br>Readmissions (1) |

|                                        |          |          | Death (0)                          | Death (1)                          |
|----------------------------------------|----------|----------|------------------------------------|------------------------------------|
| <b>Krane MK et al.<br/>2013</b>        | Elective | Elective | 30-day morbidity(36)               | 30-day morbidity(92)               |
|                                        |          |          | Infectious(17)                     | Infectious(42)                     |
|                                        |          |          | Wound infection(8)                 | Wound infection(17)                |
|                                        |          |          | Intra-abdominal abscess(8)         | Intra-abdominal abscess(20)        |
|                                        |          |          | Urinary infection(0)               | Urinary infection(1)               |
|                                        |          |          | Clostridium difficile infection(1) | Clostridium difficile infection(3) |
|                                        |          |          | Pneumonia(0)                       | Pneumonia(1)                       |
|                                        |          |          | Anastomotic leakage(3)             | Anastomotic leakage(5)             |
|                                        |          |          | Thrombotic(5)                      | Thrombotic(21)                     |
|                                        |          |          | Others(11)                         | Others(24)                         |
|                                        |          |          | Prolonged ileus(8)                 | Prolonged ileus(9)                 |
|                                        |          |          | SBO(3)                             | SBO(9)                             |
|                                        |          |          | Dehydration(0)                     | Dehydration(3)                     |
|                                        |          |          | Acute pancreatitis(0)              | Acute pancreatitis(1)              |
|                                        |          |          | Acute myocardial infarction(0)     | Acute myocardial infarction(1)     |
|                                        |          |          | Transient ischemic attack(0)       | Transient ischemic attack(1)       |
| <b>Kunitake H et al.<br/>2008</b>      | NA       | NA       | Leak(3)                            | Leak(9)                            |
|                                        |          |          | Bleeding(1)                        | Bleeding(2)                        |
|                                        |          |          | Death(2)                           | Death(1)                           |
|                                        |          |          | Infectious(6)                      | Infectious(31)                     |
|                                        |          |          | Thrombotic(3)                      | Thrombotic(2)                      |
|                                        |          |          | Cardiac(0)                         | Cardiac(2)                         |
|                                        |          |          | Hepatorenal(1)                     | Hepatorenal(2)                     |
| <b>Lightner AL et al.<br/>2017(CD)</b> | NA       | NA       | Death (0)                          | Death (0)                          |
|                                        |          |          | Non-SSI infections (5)             | Non-SSI infections (2)             |
|                                        |          |          | urinary tract infection (3)        | urinary tract infection (2)        |
|                                        |          |          | Pneumonia (2)                      | Pneumonia (0)                      |
|                                        |          |          | Line Sepsis (0)                    | Line Sepsis (0)                    |
|                                        |          |          | All SSI (9)                        | All SSI (12)                       |
|                                        |          |          | Superficial SSI (8)                | Superficial SSI (4)                |
|                                        |          |          | Deep SSI (2)                       | Deep SSI (6)                       |
|                                        |          |          | Anast leak (0)                     | Anast leak (3)                     |
|                                        |          |          | Mucocutaneous separation (0)       | Mucocutaneous separation (0)       |
|                                        |          |          | SBO/ileus (9)                      | SBO/ileus (9)                      |
|                                        |          |          | Readmission (7)                    | Readmission (12)                   |

|                                         |                                       |                                        | Return to operating room (4)                                                                                                                                                                                                                                                                                                                                     | Return to operating room (9)                                                                                                                                                                                                                                                                                                                                       |
|-----------------------------------------|---------------------------------------|----------------------------------------|------------------------------------------------------------------------------------------------------------------------------------------------------------------------------------------------------------------------------------------------------------------------------------------------------------------------------------------------------------------|--------------------------------------------------------------------------------------------------------------------------------------------------------------------------------------------------------------------------------------------------------------------------------------------------------------------------------------------------------------------|
| <b>Lightner AL et al.<br/>2017(IBD)</b> | NA                                    | NA                                     | Any postoperative complication(35)<br>Non-SSI infections(6)<br>urinary tract infection(2)<br>Pneumonia(1)<br>Non-abdominal sepsis(2)<br>C.diff colitis(1)<br>Cholangitis(0)<br>All SSIs(13)<br>sSSIs(5)<br>dSSIs(6)<br>Anastomotic leak (4)<br>Mucocutaneous separation(1)<br>small bowel obstruction(12)<br>Readmission(12)<br>Return to the operating room(10) | Any postoperative complication(57)<br>Non-SSI infections(10)<br>urinary tract infection(5)<br>Pneumonia(2)<br>Non-abdominal sepsis(2)<br>C.diff colitis(0)<br>Cholangitis(1)<br>All SSIs(22)<br>sSSIs(11)<br>dSSIs(11)<br>Anastomotic leak (1)<br>Mucocutaneous separation(1)<br>small bowel obstruction(20)<br>Readmission(17)<br>Return to the operating room(8) |
| <b>Myrelid P et al.<br/>2014</b>        | Elective: 98Urgent:<br>11Emergency: 2 | Elective: 157Urgent:<br>21Emergency: 9 | Any complication (38)<br>Anastomotic complications (8)<br>Infectious complications (excluding anastomotic<br>complications)(18)<br>Other (12)<br>Need for Repeat surgery (9)<br>Need for radiology-guided drainage (4)                                                                                                                                           | Any complication (54)<br>Anastomotic complications (15)<br>Infectious complications<br>(excluding anastomotic complications) (26)<br>Other (13)<br>Need for Repeat surgery (13)<br>Need for radiology-guided drainage (7)                                                                                                                                          |
| <b>Nelson R et al.<br/>2014</b>         | Acute                                 | Acute                                  | Infectious(6)<br>Pelvic abscess(2)<br>Wound(2)<br>Non-specific(2)<br>Non-infectious(5)<br>Thrombosis(2)<br>Hospitalizations(3)<br>Wound failure(0)<br>Total(9)                                                                                                                                                                                                   | Infectious(9)<br>Pelvic abscess(2)<br>Wound(3)<br>Non-specific(4)<br>Non-infectious(13)<br>Thrombosis(3)<br>Hospitalizations(7)<br>Wound failure(4)<br>Total(18)                                                                                                                                                                                                   |
| <b>Nørgård BM et<br/>al. 2014</b>       | NA                                    | NA                                     | Death (1)<br>Reoperation (16)<br>Anastomosis leakage (8)<br>Percutaneous abscess drainage (0)                                                                                                                                                                                                                                                                    | Death (54)<br>Reoperation (175)<br>Anastomosis leakage (56)<br>Percutaneous abscess drainage (3)                                                                                                                                                                                                                                                                   |

|                                |                             |                             |                                                                                                                                                                                                                                                                                     |                                                                                                                                                                                                                                                                                      |
|--------------------------------|-----------------------------|-----------------------------|-------------------------------------------------------------------------------------------------------------------------------------------------------------------------------------------------------------------------------------------------------------------------------------|--------------------------------------------------------------------------------------------------------------------------------------------------------------------------------------------------------------------------------------------------------------------------------------|
|                                |                             |                             | Within 14 days:Death (0)<br>Reoperation (1)<br>Anastomosis leakage (1)<br>15-30 days:55Death (0)<br>Reoperation (6)<br>Anastomosis leakage (2)<br>31-84 days:116Death (1)<br>Reoperation (9)<br>Anastomosis leakage (5)                                                             |                                                                                                                                                                                                                                                                                      |
| <b>Nørgård BM et al. 2012</b>  | Acute or elective           | Acute or elective           | Death(0)<br>Reoperation(43)<br>Anastomosis leakage(1)<br>Percutaneous abscess drainage(0)                                                                                                                                                                                           | Death(30)<br>Reoperation(230)<br>Anastomosis leakage(16)<br>Percutaneous abscess drainage(2)                                                                                                                                                                                         |
| <b>Rizzo G et al. 2011</b>     | Elective:49<br>Urgent:5     | Elective:54<br>Urgent:6     | Cumulative complications(14)<br>Infective complications(9)<br>Hypomotility(2)<br>Thrombotic complications(1)<br>Hepatorenal failure(2)<br>Bleeding requiring re-surgery(3)<br>Anastomotic leak(4)<br>Hospital readmission(6)                                                        | Cumulative complications(10)<br>Infective complications(8)<br>Hypomotility(0)<br>Thrombotic complications(0)<br>Hepatorenal failure(1)<br>Bleeding requiring re-surgery(1)<br>Anastomotic leak(3)<br>Hospital readmission(3)                                                         |
| <b>Shwaartz1 C et al. 2016</b> | NA                          | NA                          | Anastomotic leak(4)Intra-abdominal abscess(4)Wound infection(5)Extra-abdominal infection(3)Readmission(6)                                                                                                                                                                           | Anastomotic leak(11)Intra-abdominal abscess(4)Wound infection(9)Extra-abdominal infection(4)Readmission(11)                                                                                                                                                                          |
| <b>Syed A et al. 2013</b>      | Urgent: 15<br>Elective: 135 | Urgent: 24<br>Elective: 151 | Myocardial infarction (1)<br>Readmission (28)<br>Postoperative bleeding (7)<br>Intra-abdominal abscess (21)<br>Peritonitis (6)<br>Anastomotic leak (9)<br>Wound dehiscence (5)<br>Local fistula (2)<br>Wound infection (28)<br>Sepsis (11)<br>Pneumonia (4)<br>Major infection (26) | Myocardial infarction (3)<br>Readmission (23)<br>Postoperative bleeding (12)<br>Intra-abdominal abscess (18)<br>Peritonitis (8)<br>Anastomotic leak (9)<br>Wound dehiscence (6)<br>Local fistula (4)<br>Wound infection (20)<br>Sepsis (17)<br>Pneumonia (8)<br>Major infection (31) |

|                                 |                                                                        |                                                                            |                                                                                                                                                                                                                                                                                                                                                                                               |                                                                                                                                                                                                                                                                                                                           |
|---------------------------------|------------------------------------------------------------------------|----------------------------------------------------------------------------|-----------------------------------------------------------------------------------------------------------------------------------------------------------------------------------------------------------------------------------------------------------------------------------------------------------------------------------------------------------------------------------------------|---------------------------------------------------------------------------------------------------------------------------------------------------------------------------------------------------------------------------------------------------------------------------------------------------------------------------|
|                                 |                                                                        |                                                                            | Reoperation (24)<br>Deep venous thrombosis (10)<br>Pulmonary embolism (3)<br>Mortality (2)<br>Intra-abdominal septic complication (28)<br>Surgical site complication (48)<br>Infectious complication (54)<br>Major complication (47)                                                                                                                                                          | Reoperation (23)<br>Deep venous thrombosis (4)<br>Pulmonary embolism (2)<br>Mortality (1)<br>Intra-abdominal septic complication (27)<br>Surgical site complication (39)<br>Infectious complication (44)<br>Major complication (47)                                                                                       |
| <b>Uchino M et al. 2013(UC)</b> | Urgent: 4<br>Elective: 18                                              | Urgent: 49<br>Elective: 125                                                | Overall surgical site infection (1)<br>Incisional surgical site infection (1)<br>Organ/space surgical site infection (0)<br>Other infectious complications(0)                                                                                                                                                                                                                                 | Overall surgical site infection (46)<br>Incisional surgical site infection (31)<br>Organ/space surgical site infection (15)<br>Other infectious complications(21)                                                                                                                                                         |
| <b>Uchino M et al. 2013(CD)</b> | NA                                                                     | NA                                                                         | SSI(9)Incisional(4)Organ/space(5)                                                                                                                                                                                                                                                                                                                                                             | SSI (99)Incisional(70)Organ/space (29)                                                                                                                                                                                                                                                                                    |
| <b>Ward ST et al. 2017</b>      | Within 12 weeks/Within 4 weeks<br>Urgent: 442/304<br>Elective: 311/114 | Within 12 weeks/Within 4 weeks<br>Urgent: 3178/3316<br>Elective: 2294/2491 | within 12 weeks/within 4 weeks<br>Any complication(94/54)<br>Gastrointestinal(55/31)<br>Wounds(16/10)<br>Infections(35/19)<br>Renal/endocrine(0/0)<br>Cardiovascular(0/0)<br>Pulmonary(0/0)<br>Neurological(0/0)                                                                                                                                                                              | within 12 weeks/within 4 weeks<br>Any complication: (656/696)<br>Gastrointestinal: (349/373)<br>Wounds: (122/128)<br>Infections: (270/286)<br>Renal/endocrine: (115/118)<br>Cardiovascular: (95/100)<br>Pulmonary: (50/52)<br>Neurological: (8/8)                                                                         |
| <b>Waterman M et al. 2013</b>   | Urgent/Elective                                                        | Urgent/Elective                                                            | Within 14 days/15-30 days/31-180 days<br>Re-hospitalisation(16/9/15)<br>Fever after surgery(9/5/14)<br>Urinary tract infection(3/3/5)<br>Pneumonia(1/2/2)<br>Other serious infection(1/2/2)<br>Wound infection(13/6/18)<br>Bacteraemia(3/0/4)<br>Postoperative ileus/small bowel obstruction(13/11/16)<br>Anastomotic leak(2/0/3)<br>Postoperative antibiotics(11/8/16)<br>Reoperation(2/1/5) | Re-hospitalisation(41)<br>Fever after surgery(42)<br>Urinary tract infection(11)<br>Pneumonia(9)<br>Other serious infection(5)<br>Wound infection(29)<br>Bacteraemia(5)<br>Postoperative ileus/small bowel obstruction(67)<br>Anastomotic leak(15)<br>Postoperative antibiotics(38)<br>Reoperation(12)<br>Septic shock(4) |

|                               |                       |                       | Septic shock(1/0/2)                                                                                                                                                                                                                                                                                                                                               | Percutaneous abscess drainage(14)                                                                                                                                                                                                                                                                                                                                 |
|-------------------------------|-----------------------|-----------------------|-------------------------------------------------------------------------------------------------------------------------------------------------------------------------------------------------------------------------------------------------------------------------------------------------------------------------------------------------------------------|-------------------------------------------------------------------------------------------------------------------------------------------------------------------------------------------------------------------------------------------------------------------------------------------------------------------------------------------------------------------|
|                               |                       |                       | Percutaneous abscess drainage(4/1/2)                                                                                                                                                                                                                                                                                                                              | Death at 30 days(1)                                                                                                                                                                                                                                                                                                                                               |
|                               |                       |                       | Death at 30 days(0/1/1)                                                                                                                                                                                                                                                                                                                                           | Poor healing (due to leak, reoperation, abscess drainage, wound infection)(35)                                                                                                                                                                                                                                                                                    |
|                               |                       |                       | Poor healing (due to leak, reoperation, abscess drainage, wound infection)(13/7/19)                                                                                                                                                                                                                                                                               |                                                                                                                                                                                                                                                                                                                                                                   |
| <b>Yamada A et al. 2017</b>   | Urgent:23Elective:106 | Urgent:35Elective:215 | UC/CDInfectious: (9/10)<br>Abdominal abscess (2/6)<br>SSIs (4/1)<br>Leakage (2/2)<br>Respiratory infection (0/1)<br>Urinary infection (1/0)<br>Non-infectious: 6/15Ileus (1/4) Bleeding (1/2)<br>PE/DVT (0/1)<br>Anemia (0/0)<br>Skin lesion (1/1)<br>Wound dehiscence (1/1)<br>Urinary retention (0/1)<br>Abdominal pain:(2/0)<br>AKI (0/1)<br>Tachycardia (0/0) | UC/CDInfectious: 18/16Abdominal abscess (10/8)<br>SSIs (2/3)<br>Leakage (2/2)<br>Respiratory infection (2/3)<br>Urinary infection (2/0)<br>Non-infectious: 30/25Ileus (6/5)<br>Bleeding (2/5)<br>PE/DVT (0/1)<br>Anemia (1/0)<br>Skin lesion (3/2)<br>Wound dehiscence (6/1)<br>Urinary retention (2/1)<br>Abdominal pain:(4/2)<br>AKI (0/0)<br>Tachycardia (0/0) |
| <b>Yamamoto T et al. 2016</b> | NA                    | NA                    | Overall complications (17)<br>Intra-abdominal sepsis (9)<br>Anastomotic leak (7)                                                                                                                                                                                                                                                                                  | Overall complications (38)<br>Intra-abdominal sepsis (18)<br>Anastomotic leak (12)                                                                                                                                                                                                                                                                                |
| <b>Zittan E et al. 2016</b>   | NA                    | NA                    | Within 14 days/15-30 days/31-180 days<br>DVT(0/1/3)<br>SBO(0/3/12)<br>wound infection(2/1/8)<br>Pelvic abscess (1/2/11)<br>Pouch anastomosis leak (1/1/8)                                                                                                                                                                                                         | DVT (23)<br>ileus/SBO (92)<br>wound infection (79)<br>Pelvic abscess (96)<br>Pouch anastomosis leak (66)                                                                                                                                                                                                                                                          |

UC: Ulcerative colitis; CD: Crohn Disease; NA: not available; IBD: Inflammatory bowel disease; 5-ASA: 5-Aminosalicylic acid; 6-MP: 6-Mercaptopurine; AZA: azathioprine; MTX: methotrexate; CsA: Ciclosporin A; IPAA: ileal pouch-anal anastomosis; SSI: Surgical site infectious; sSSI: superficial surgical site infection; dSSI: deep space surgical site infection; DVT: deep venous thrombosis; SBO: small-bowel obstruction; AMI: acute myocardial infarction; TIA: transient ischemic attack; PE: pulmonary embolism; AKI: acute kidney injury; *C.diff: Clostridium difficile*.

**Table S2: Sensitivity analysis for three forest plot**

| <b>Wound infection (within 4 weeks)</b>                       |           |              |                      |                 |
|---------------------------------------------------------------|-----------|--------------|----------------------|-----------------|
| <b>Excluded study</b>                                         | <b>OR</b> | <b>95%CI</b> | <b>I<sup>2</sup></b> | <b>P values</b> |
| Yamada A et al. 2017                                          | 1.09      | [0.59, 2.03] | 65%                  | 0.78            |
| Nelson R et al. 2014                                          | 1.06      | [0.54, 2.10] | 67%                  | 0.86            |
| Ward ST et al. 2017                                           | 1.02      | [0.45, 2.32] | 64%                  | 0.96            |
| Yamada A et al. 2017                                          | 0.88      | [0.46, 1.66] | 58%                  | 0.69            |
| Zittan E et al. 2016                                          | 1.29      | [0.79, 2.12] | 41%                  | 0.31            |
| Waterman M et al. 2013                                        | 0.86      | [0.44, 1.66] | 51%                  | 0.65            |
| <b>Surgical site infectious complications(within 4 weeks)</b> |           |              |                      |                 |
| <b>Excluded study</b>                                         | <b>OR</b> | <b>95%CI</b> | <b>I<sup>2</sup></b> | <b>P values</b> |
| Kotze PG et al. 2017                                          | 1.14      | [0.41, 3.15] | 65%                  | 0.80            |
| Kotze PG et al. 2017(AD)                                      | 1.65      | [0.90, 3.01] | 44%                  | 0.10            |
| Syed A et al. 2013                                            | 1.17      | [0.37, 3.72] | 67%                  | 0.79            |
| Yamada A et al. 2017                                          | 1.54      | [0.71, 3.35] | 63%                  | 0.28            |
| Ferrante M et al. 2017                                        | 1.54      | [0.62, 3.82] | 62%                  | 0.35            |
| Yamada A et al. 2017                                          | 1.16      | [0.58, 2.30] | 51%                  | 0.68            |
| <b>Surgical site infectious complications(within 4 weeks)</b> |           |              |                      |                 |
| <b>Excluded study</b>                                         | <b>OR</b> | <b>95%CI</b> | <b>I<sup>2</sup></b> | <b>P values</b> |
| Kotze PG et al. 2017                                          | 0.66      | [0.35, 1.28] | 71%                  | 0.22            |
| Kotze PG et al. 2017(AD)                                      | 0.84      | [0.46, 1.53] | 72%                  | 0.57            |
| Lightner AL et al. 2017(CD)                                   | 0.76      | [0.38, 1.51] | 75%                  | 0.43            |
| Syed A et al. 2013                                            | 0.67      | [0.34, 1.32] | 68%                  | 0.25            |
| Uchino M et al. 2013(CD)                                      | 0.91      | [0.51, 1.64] | 66%                  | 0.51            |



|                              |      |              |     |      |
|------------------------------|------|--------------|-----|------|
| Yamada A et al. 2017         | 0.79 | [0.42, 1.49] | 75% | 0.46 |
| Ferrante M et al. 2009       | 0.83 | [0.45, 1.55] | 73% | 0.56 |
| Ferrante M et al. 2017       | 0.74 | [0.37, 1.46] | 75% | 0.38 |
| Uchino M et al. 2013(UC)     | 0.86 | [0.47, 1.57] | 72% | 0.61 |
| Yamada A et al. 2017         | 0.66 | [0.37, 1.19] | 69% | 0.17 |
| Lightner AL et al. 2017(IBD) | 0.75 | [0.37, 1.51] | 75% | 0.42 |

Sensitivity analysis was used for finding the source of heterogeneity by observing the change of heterogeneity after excluding particular study. The Odds ratio (OR), 95% confidence interval (CI),  $I^2$  and  $P$  value was shown after excluding the specified study.  $P$  value was calculated by Z test in the forest plot.  $I^2$  measured the heterogeneity.

**Figure S1** Quality assessment by National Heart, Lung, and Blood Institute Quality Assessment Tool for Observational Cohort and Cross-Sectional Studies. Details of each bias risk assessment for each study are shown. “Yes”, “Not applied”, and “No” were indicated by green, yellow, and red, respectively. Quality Assessment results were as follows. 1. All studies had a clearly specified objective. 2. All studies clearly defined the population. 3. Only one study had a participation rate of eligible patients  $\geq 50\%$  due to case matching. 4. All studies appropriately selected patients. 5. No study provided sample size justification/power/variance/effect estimates. 6. All studies measured exposure(s) of interest before outcome(s). 7. All studies had an appropriate time frame. 8. Five studies set different exposure groups according to the time of last anti-TNF- $\alpha$  injection before surgery, generating a recording of "Yes", while the rest were recorded as "NA" without mention. 9. All studies clearly defined exposure measures that were valid, reliable, and consistent. 10. In addition to the time of last preoperative anti-TNF- $\alpha$  injection, three studies repeated testing of anti-TNF- $\alpha$  serum levels in the exposure group, which was labeled as "Yes"; the rest were labeled "No." 11. All studies clearly defined outcomes that were valid, reliable, and consistent. 12. The response to items of outcome assessor blinding to levels of exposure was “No” for four studies that did not have adequate blinding, while the response was “NA” in 23 studies which did not report clear information about blinding. 13. For all studies, loss to follow-up was  $\leq 20\%$ . 14. Two studies did not use multivariate regression analysis to measure confounding variables, which were indicated as “No”, while the rest measured key confounding variables and adjusted statistically.

|                              | 1. Objective Clearly Specified | 2. Study Population Clearly Defined | 3. Participation Rate of Eligible Patients $\geq 50\%$ | 4. Patients Selected Appropriately | 5. Sample Size Justification/Power/Variance/Effect Estimates Provided | 6. Exposure(s) of Interest Measured Before Outcome(s) | 7. Appropriate Time Frame | 8. Levels of Exposure Examined Appropriately | 9. Exposure Measures Clearly Defined, Valid, Reliable and Consistent | 10. Exposure(s) Assessed More Than Once Over Time | 11. Outcomes Clearly Defined, Valid, Reliable And Consistent | 12. Outcome Assessor Blinded | 13. Loss to Follow-up $\leq 20\%$ | 14. Key Confounding Variables Measured and Adjusted Statistically |
|------------------------------|--------------------------------|-------------------------------------|--------------------------------------------------------|------------------------------------|-----------------------------------------------------------------------|-------------------------------------------------------|---------------------------|----------------------------------------------|----------------------------------------------------------------------|---------------------------------------------------|--------------------------------------------------------------|------------------------------|-----------------------------------|-------------------------------------------------------------------|
| Appau KA et al. 2008         | Yes                            | Yes                                 | Yes                                                    | Yes                                | No                                                                    | Yes                                                   | Yes                       | NA                                           | Yes                                                                  | No                                                | Yes                                                          | NA                           | Yes                               | Yes                                                               |
| Bregnbak D et al. 2012       | Yes                            | Yes                                 | Yes                                                    | Yes                                | No                                                                    | Yes                                                   | Yes                       | NA                                           | Yes                                                                  | No                                                | Yes                                                          | NA                           | Yes                               | Yes                                                               |
| Canedo J et al. 2011         | Yes                            | Yes                                 | Yes                                                    | Yes                                | No                                                                    | Yes                                                   | Yes                       | NA                                           | Yes                                                                  | No                                                | Yes                                                          | No                           | Yes                               | Yes                                                               |
| Ferrante M et al. 2009       | Yes                            | Yes                                 | Yes                                                    | Yes                                | No                                                                    | Yes                                                   | Yes                       | NA                                           | Yes                                                                  | No                                                | Yes                                                          | NA                           | Yes                               | Yes                                                               |
| Ferrante M et al. 2017       | Yes                            | Yes                                 | Yes                                                    | Yes                                | No                                                                    | Yes                                                   | Yes                       | Yes                                          | Yes                                                                  | No                                                | Yes                                                          | NA                           | Yes                               | Yes                                                               |
| Gainsbury ML et al. 2011     | Yes                            | Yes                                 | Yes                                                    | Yes                                | No                                                                    | Yes                                                   | Yes                       | NA                                           | Yes                                                                  | No                                                | Yes                                                          | NA                           | Yes                               | Yes                                                               |
| Gu JY et al. 2013            | Yes                            | Yes                                 | Yes                                                    | Yes                                | No                                                                    | Yes                                                   | Yes                       | NA                                           | Yes                                                                  | No                                                | Yes                                                          | NA                           | Yes                               | Yes                                                               |
| Kotze PG et al. 2017         | Yes                            | Yes                                 | Yes                                                    | Yes                                | No                                                                    | Yes                                                   | Yes                       | NA                                           | Yes                                                                  | No                                                | Yes                                                          | NA                           | Yes                               | Yes                                                               |
| Kotze PG et al. 2017(AD)     | Yes                            | Yes                                 | No                                                     | Yes                                | No                                                                    | Yes                                                   | Yes                       | NA                                           | Yes                                                                  | Yes                                               | Yes                                                          | NA                           | Yes                               | Yes                                                               |
| Krane MK et al. 2013         | Yes                            | Yes                                 | Yes                                                    | Yes                                | No                                                                    | Yes                                                   | Yes                       | NA                                           | Yes                                                                  | No                                                | Yes                                                          | NA                           | Yes                               | Yes                                                               |
| Kunitake H et al. 2008       | Yes                            | Yes                                 | Yes                                                    | Yes                                | No                                                                    | Yes                                                   | Yes                       | NA                                           | Yes                                                                  | No                                                | Yes                                                          | NA                           | Yes                               | Yes                                                               |
| Lightner AL et al. 2017(CD)  | Yes                            | Yes                                 | Yes                                                    | Yes                                | No                                                                    | Yes                                                   | Yes                       | NA                                           | Yes                                                                  | No                                                | Yes                                                          | No                           | Yes                               | Yes                                                               |
| Lightner AL et al. 2017(IBM) | Yes                            | Yes                                 | Yes                                                    | Yes                                | No                                                                    | Yes                                                   | Yes                       | NA                                           | Yes                                                                  | No                                                | Yes                                                          | NA                           | Yes                               | Yes                                                               |
| Myrelid P et al. 2014        | Yes                            | Yes                                 | Yes                                                    | Yes                                | No                                                                    | Yes                                                   | Yes                       | Yes                                          | Yes                                                                  | No                                                | Yes                                                          | NA                           | Yes                               | Yes                                                               |
| Nelson R et al. 2014         | Yes                            | Yes                                 | Yes                                                    | Yes                                | No                                                                    | Yes                                                   | Yes                       | NA                                           | Yes                                                                  | No                                                | Yes                                                          | NA                           | Yes                               | Yes                                                               |
| Nørgård BM et al. 2012       | Yes                            | Yes                                 | Yes                                                    | Yes                                | No                                                                    | Yes                                                   | Yes                       | NA                                           | Yes                                                                  | No                                                | Yes                                                          | NA                           | Yes                               | No                                                                |
| Nørgård BM et al. 2014       | Yes                            | Yes                                 | Yes                                                    | Yes                                | No                                                                    | Yes                                                   | Yes                       | Yes                                          | Yes                                                                  | No                                                | Yes                                                          | NA                           | Yes                               | No                                                                |
| Rizzo G et al. 2011          | Yes                            | Yes                                 | Yes                                                    | Yes                                | No                                                                    | Yes                                                   | Yes                       | NA                                           | Yes                                                                  | No                                                | Yes                                                          | NA                           | Yes                               | Yes                                                               |
| Shwaartz C et al. 2016       | Yes                            | Yes                                 | Yes                                                    | Yes                                | No                                                                    | Yes                                                   | Yes                       | NA                                           | Yes                                                                  | No                                                | Yes                                                          | NA                           | Yes                               | Yes                                                               |
| Syed A et al. 2013           | Yes                            | Yes                                 | Yes                                                    | Yes                                | No                                                                    | Yes                                                   | Yes                       | NA                                           | Yes                                                                  | No                                                | Yes                                                          | No                           | Yes                               | Yes                                                               |
| Uchino M et al. 2013(UC)     | Yes                            | Yes                                 | Yes                                                    | Yes                                | No                                                                    | Yes                                                   | Yes                       | NA                                           | Yes                                                                  | No                                                | Yes                                                          | NA                           | Yes                               | Yes                                                               |
| Uchino M et al. 2013(CD)     | Yes                            | Yes                                 | Yes                                                    | Yes                                | No                                                                    | Yes                                                   | Yes                       | NA                                           | Yes                                                                  | No                                                | Yes                                                          | NA                           | Yes                               | Yes                                                               |
| Ward ST et al. 2017          | Yes                            | Yes                                 | Yes                                                    | Yes                                | No                                                                    | Yes                                                   | Yes                       | NA                                           | Yes                                                                  | No                                                | Yes                                                          | NA                           | Yes                               | Yes                                                               |
| Waterman M et al. 2013       | Yes                            | Yes                                 | Yes                                                    | Yes                                | No                                                                    | Yes                                                   | Yes                       | Yes                                          | Yes                                                                  | Yes                                               | Yes                                                          | NA                           | Yes                               | Yes                                                               |
| Yamada A et al. 2017         | Yes                            | Yes                                 | Yes                                                    | Yes                                | No                                                                    | Yes                                                   | Yes                       | NA                                           | Yes                                                                  | No                                                | Yes                                                          | NA                           | Yes                               | Yes                                                               |
| Yamamoto T et al. 2016       | Yes                            | Yes                                 | Yes                                                    | Yes                                | No                                                                    | Yes                                                   | Yes                       | NA                                           | Yes                                                                  | No                                                | Yes                                                          | No                           | Yes                               | Yes                                                               |
| Zittan E et al. 2016         | Yes                            | Yes                                 | Yes                                                    | Yes                                | No                                                                    | Yes                                                   | Yes                       | Yes                                          | Yes                                                                  | Yes                                               | Yes                                                          | NA                           | Yes                               | Yes                                                               |

**Figure S2** Venn diagram showing characteristics of 27 included studies. Studies were grouped according to last preoperative anti-TNF- $\alpha$  injection time. Six of the studies formed a "within 4 weeks" cohort, while eight studies formed the "within 8 weeks" cohort. Nineteen studies formed the "within 8 weeks" cohort. Some studies had multiple different time cohorts, as shown in the intersecting areas. The disease type investigated in each study is also indicated by blue for Chron's disease, yellow for ulcerative colitis, and green for inflammatory bowel disease.

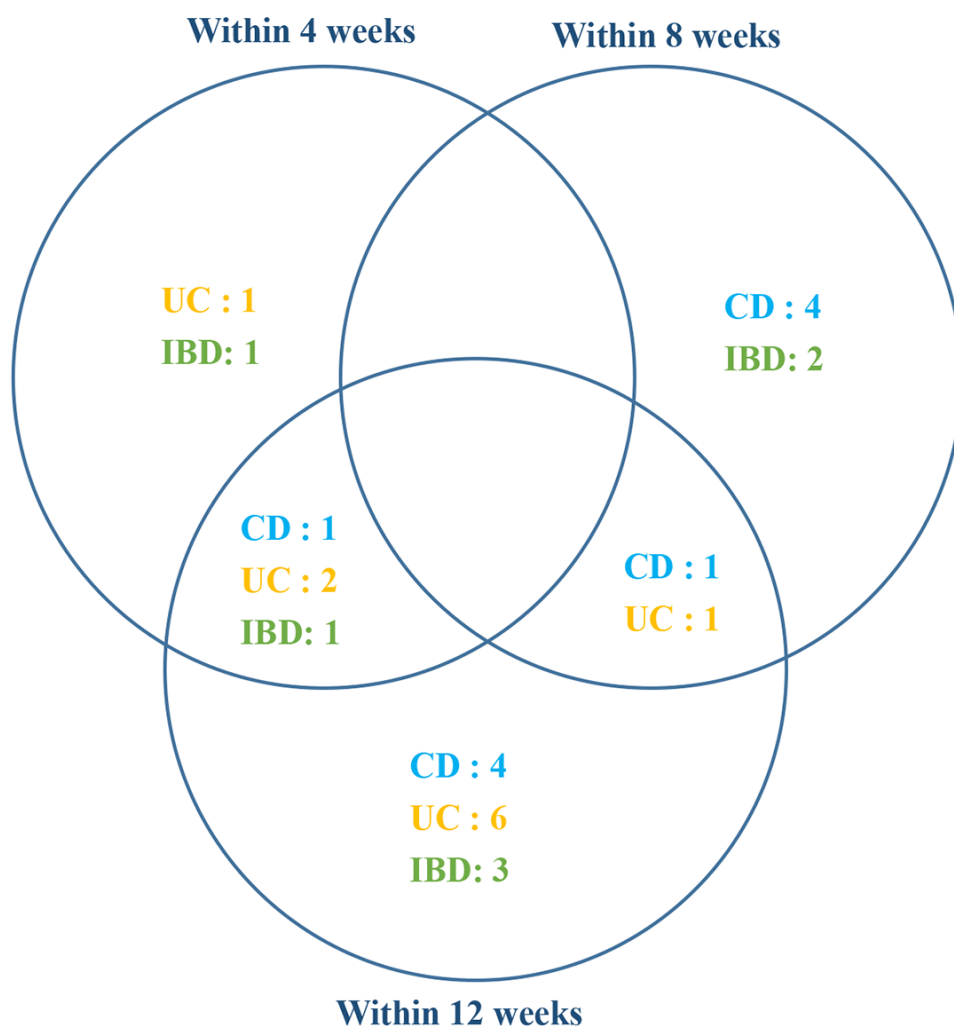

**Figure S3** Different preoperative anti-tumor necrosis factor alpha agents (anti-TNF- $\alpha$ ) windows in within 2 weeks vs. greater than 2 weeks: Forest plot for anastomotic leakage.

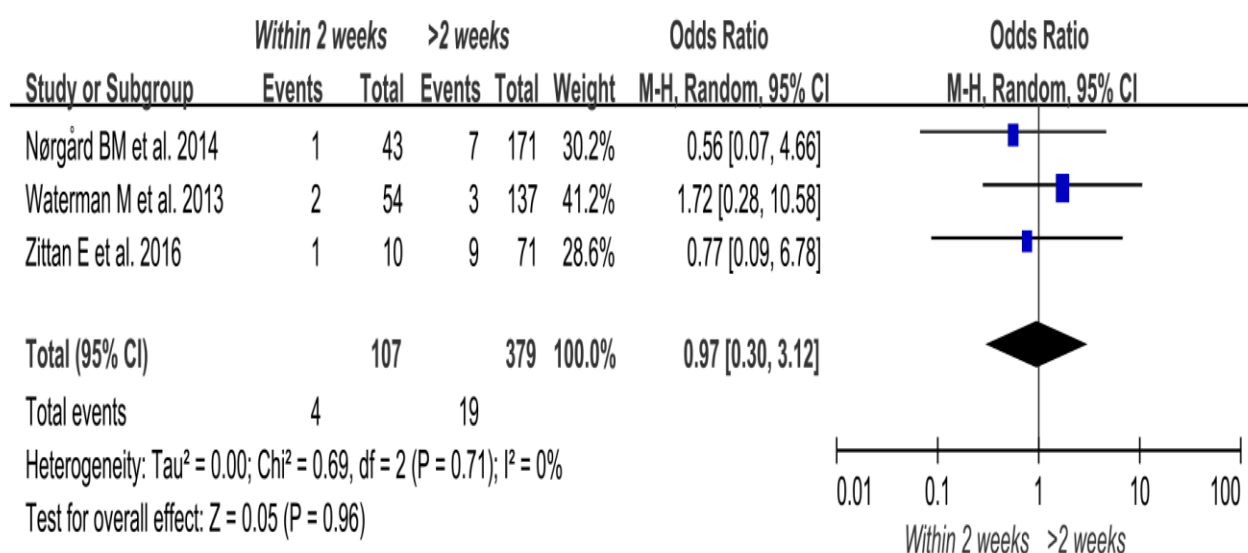

**Figure S4** Different preoperative anti-tumor necrosis factor alpha agents (anti-TNF- $\alpha$ ) windows in within 8 weeks vs. greater than 8 weeks: Forest plot for anastomotic leakage.

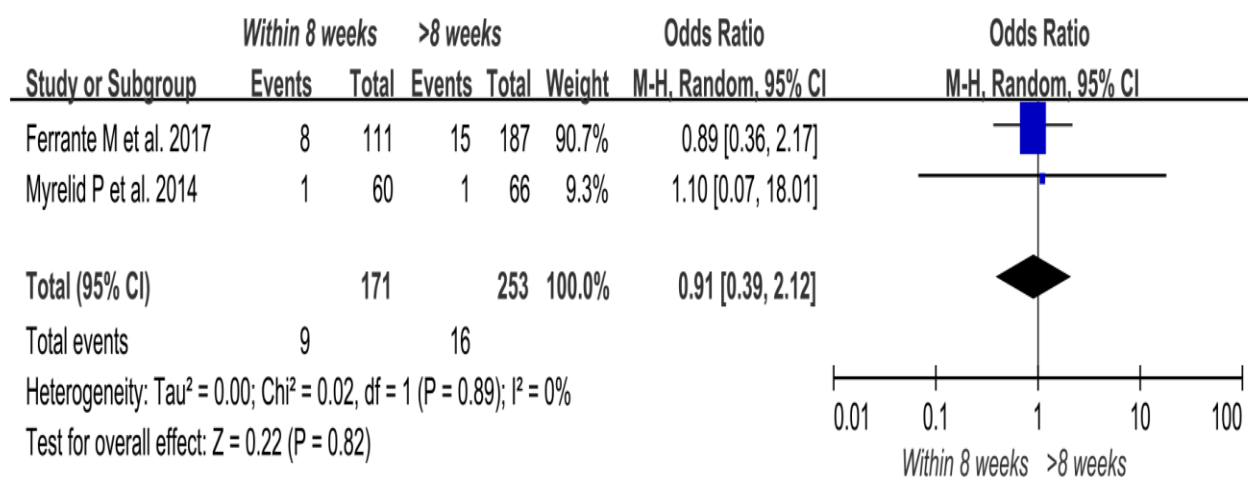

**Figure S5** Funnel plots for all forest plots.

## SSI

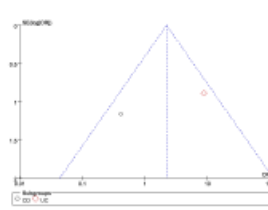

**A**

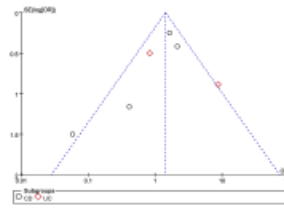

**B**

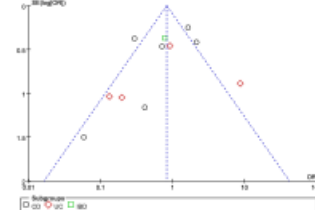

**C**

## Anastomotic leak

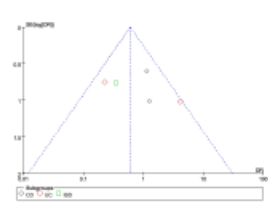

**A**

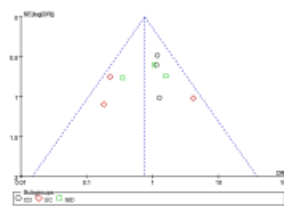

**B**

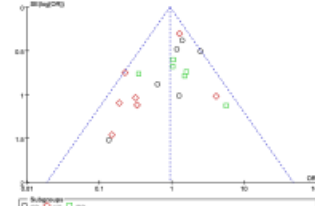

**C**

## Abscess

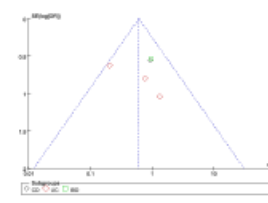

**A**

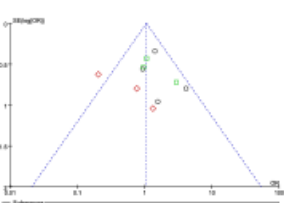

**B**

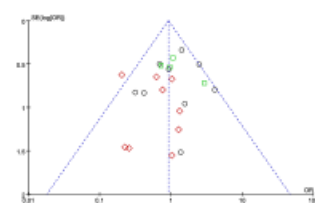

**C**

## Wound infection

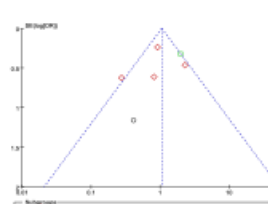

**A**

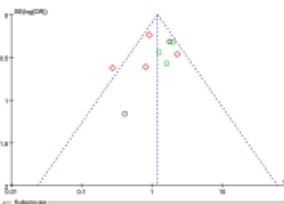

**B**

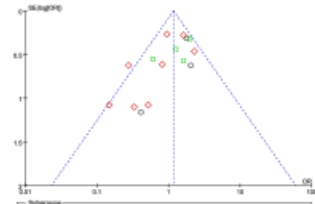

**C**

## Different time Anti-TNF-a using

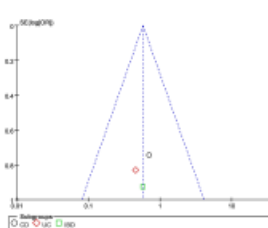

**A**

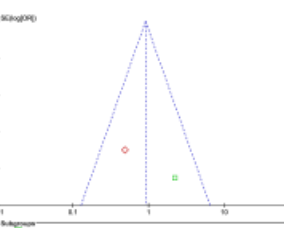

**B**

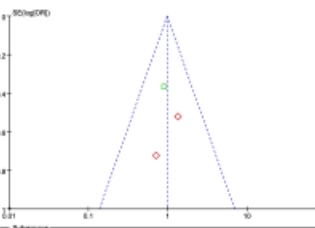

**C**
